# Supplementary material
Source: HighWire-hosted journal article supplement (https://sit.bmj.com/highwire/filestream/199/field_highwire_adjunct_files/5/bmjsit-2020-000059supp006_data_supplement.pdf)

**Supplementary file 4: Showing the risk (%) of AcomAC aneurysms associated with mild to moderate A1 asymmetry ratio ( $\leq 1.5$ ) and substantial A1 asymmetry ratios ( $>1.5$ ). A1= the first segment of anterior cerebral artery, AcomAC = anterior communicating artery complex**

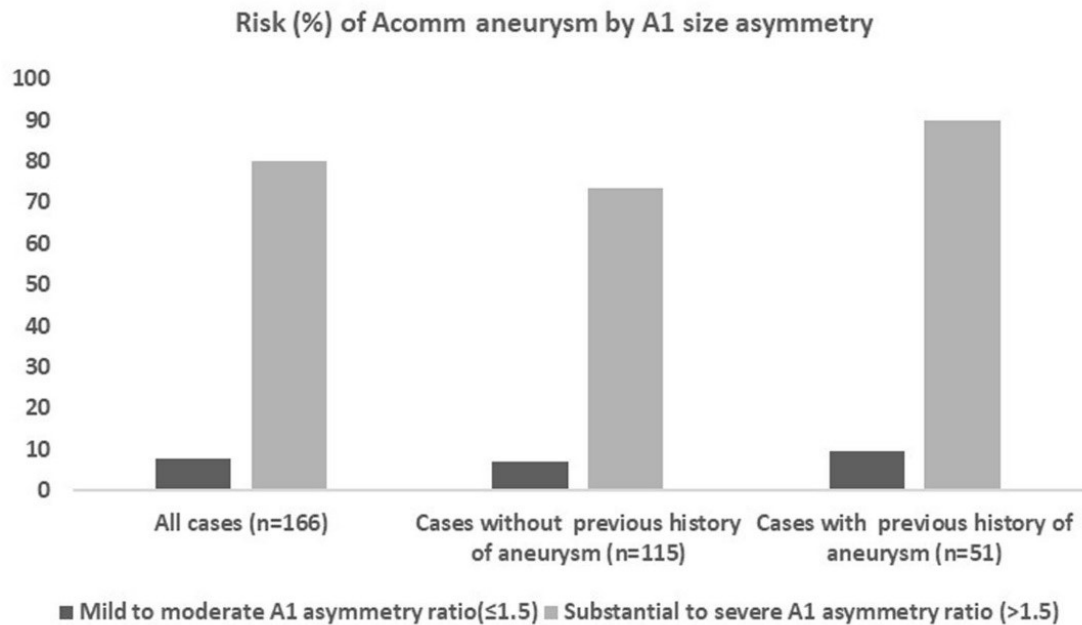

Supplement: bmjsit-2020-000059supp006_data_supplement.pdf [file bmjsit-2020-000059supp006_data_supplement.pdf]
